# Supplementary material for: High-voltage performance of LiNi0.5Mn1.5O4-based lithium-ion batteries with 4-methyl-1,3,2-dioxathiolane-2,2-dioxide (MDTD) as an electrolyte additive
Source: Royal Society of Chemistry journal article supplement (doi:10.1039/d4ta02559h), 2024-01-01
Supplement: d4ta02559h1.pdf [file d4ta02559h1.pdf]

Figure S1. LSV curves of the Pt electrode in STD and 0.5% MDTD electrolytes recorded at a rate of  $0.5 \text{ mV}\cdot\text{s}^{-1}$ .

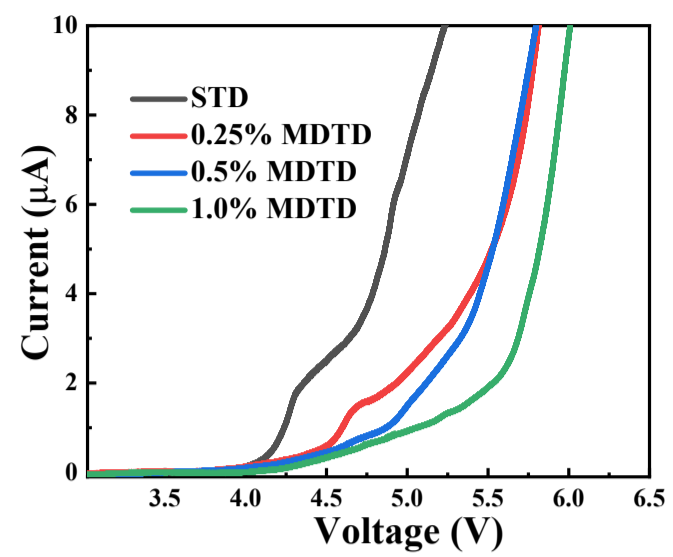

Figure S2. Charge–discharge curves of LNMO/Li half-cells in the (a) STD, (b) 0.25% MDTD, (c) 0.5% MDTD and (d) 1.0% MDTD electrolytes at different rates.

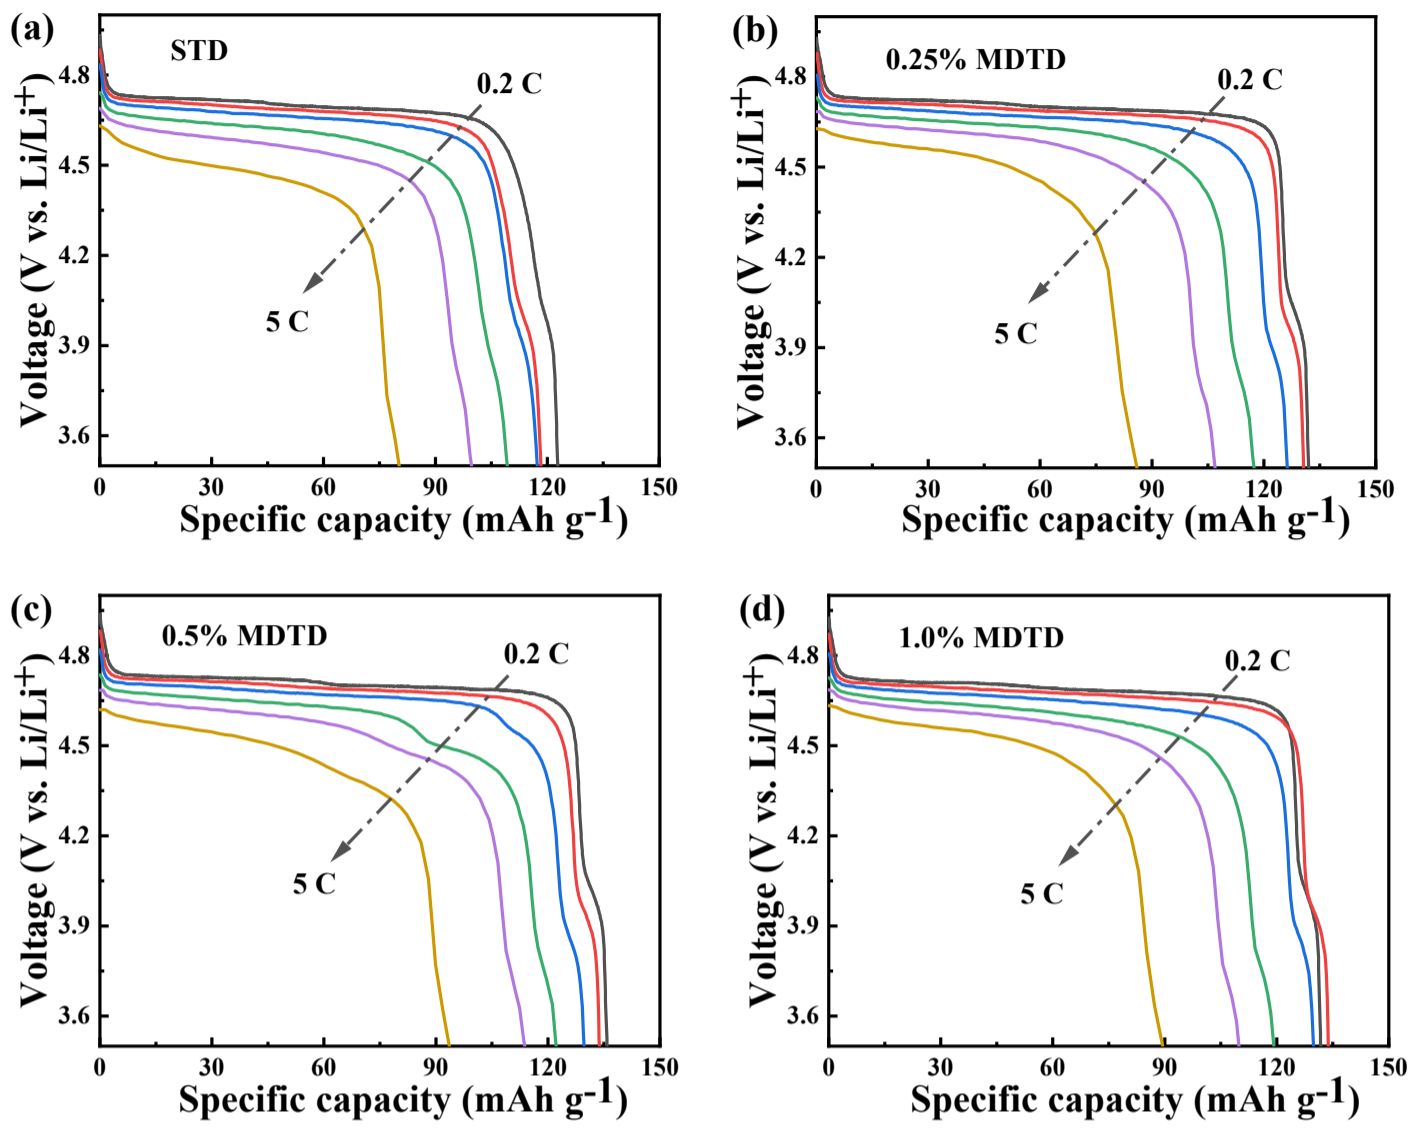

Figure S3. Charge–discharge curves of LNMO/Li half-cells in the STD, 0.25% MDTD, 0.5% MDTD and 1.0% MDTD electrolytes from representative cycles at (a–d) 3 C and (e–h) 5 C.

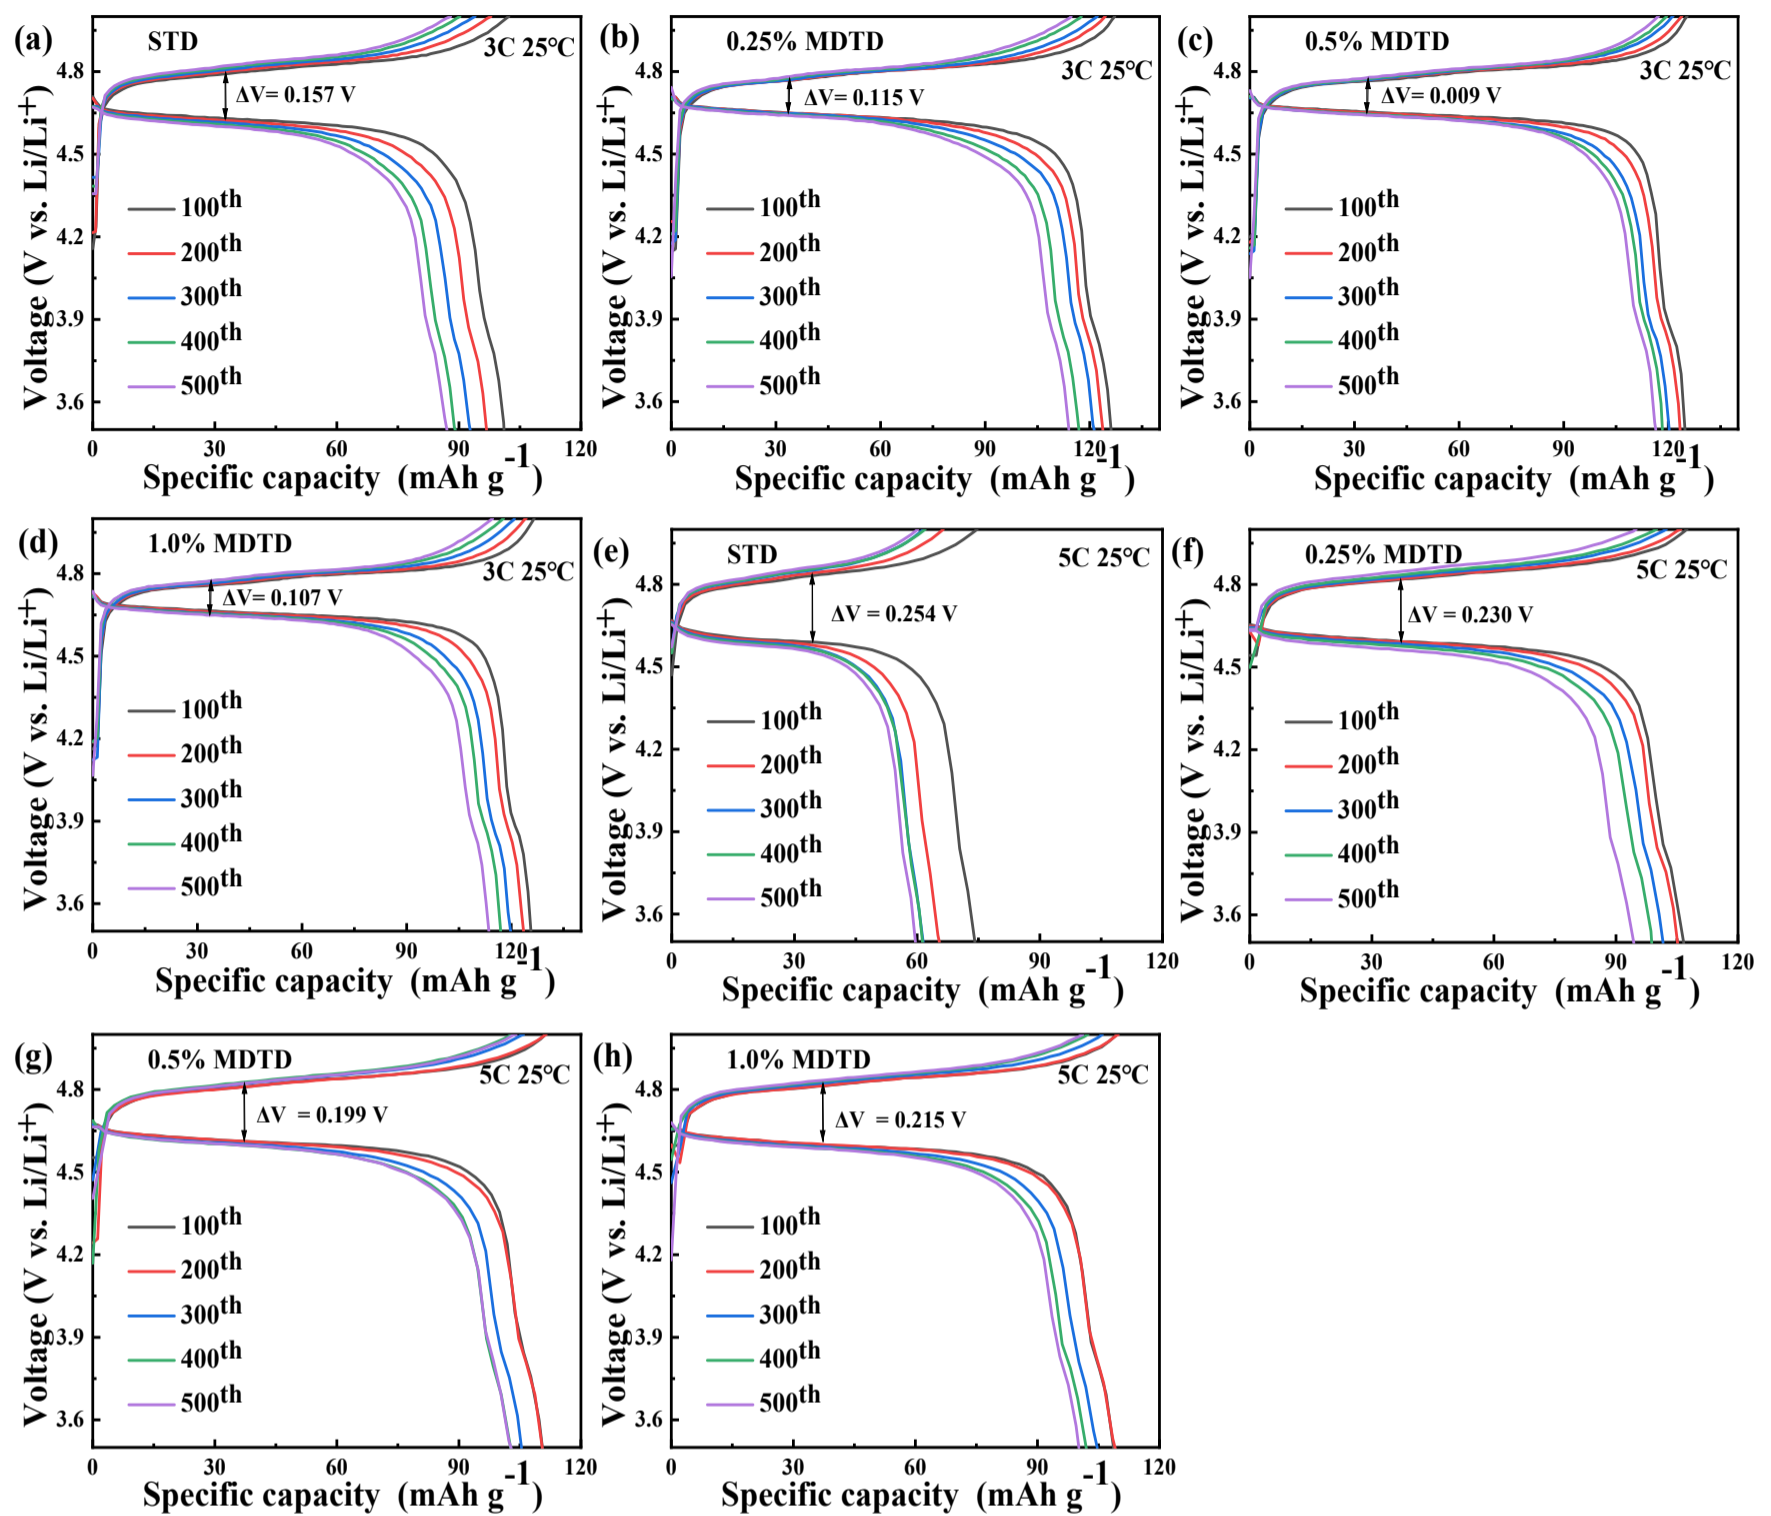

Figure S4 Cyclic voltammetry curves for the LNMO/Li half-cells in the (a) STD, (b) 0.25% MDTD, (c) 0.5% MDTD and (d) 1.0% MDTD electrolytes at scan rates from 0.1 to 0.5  $\text{mV s}^{-1}$  after 200 cycles at 5 C. (e) EIS equivalent circuit model of the LNMO/Li half-cells with the four electrolytes.

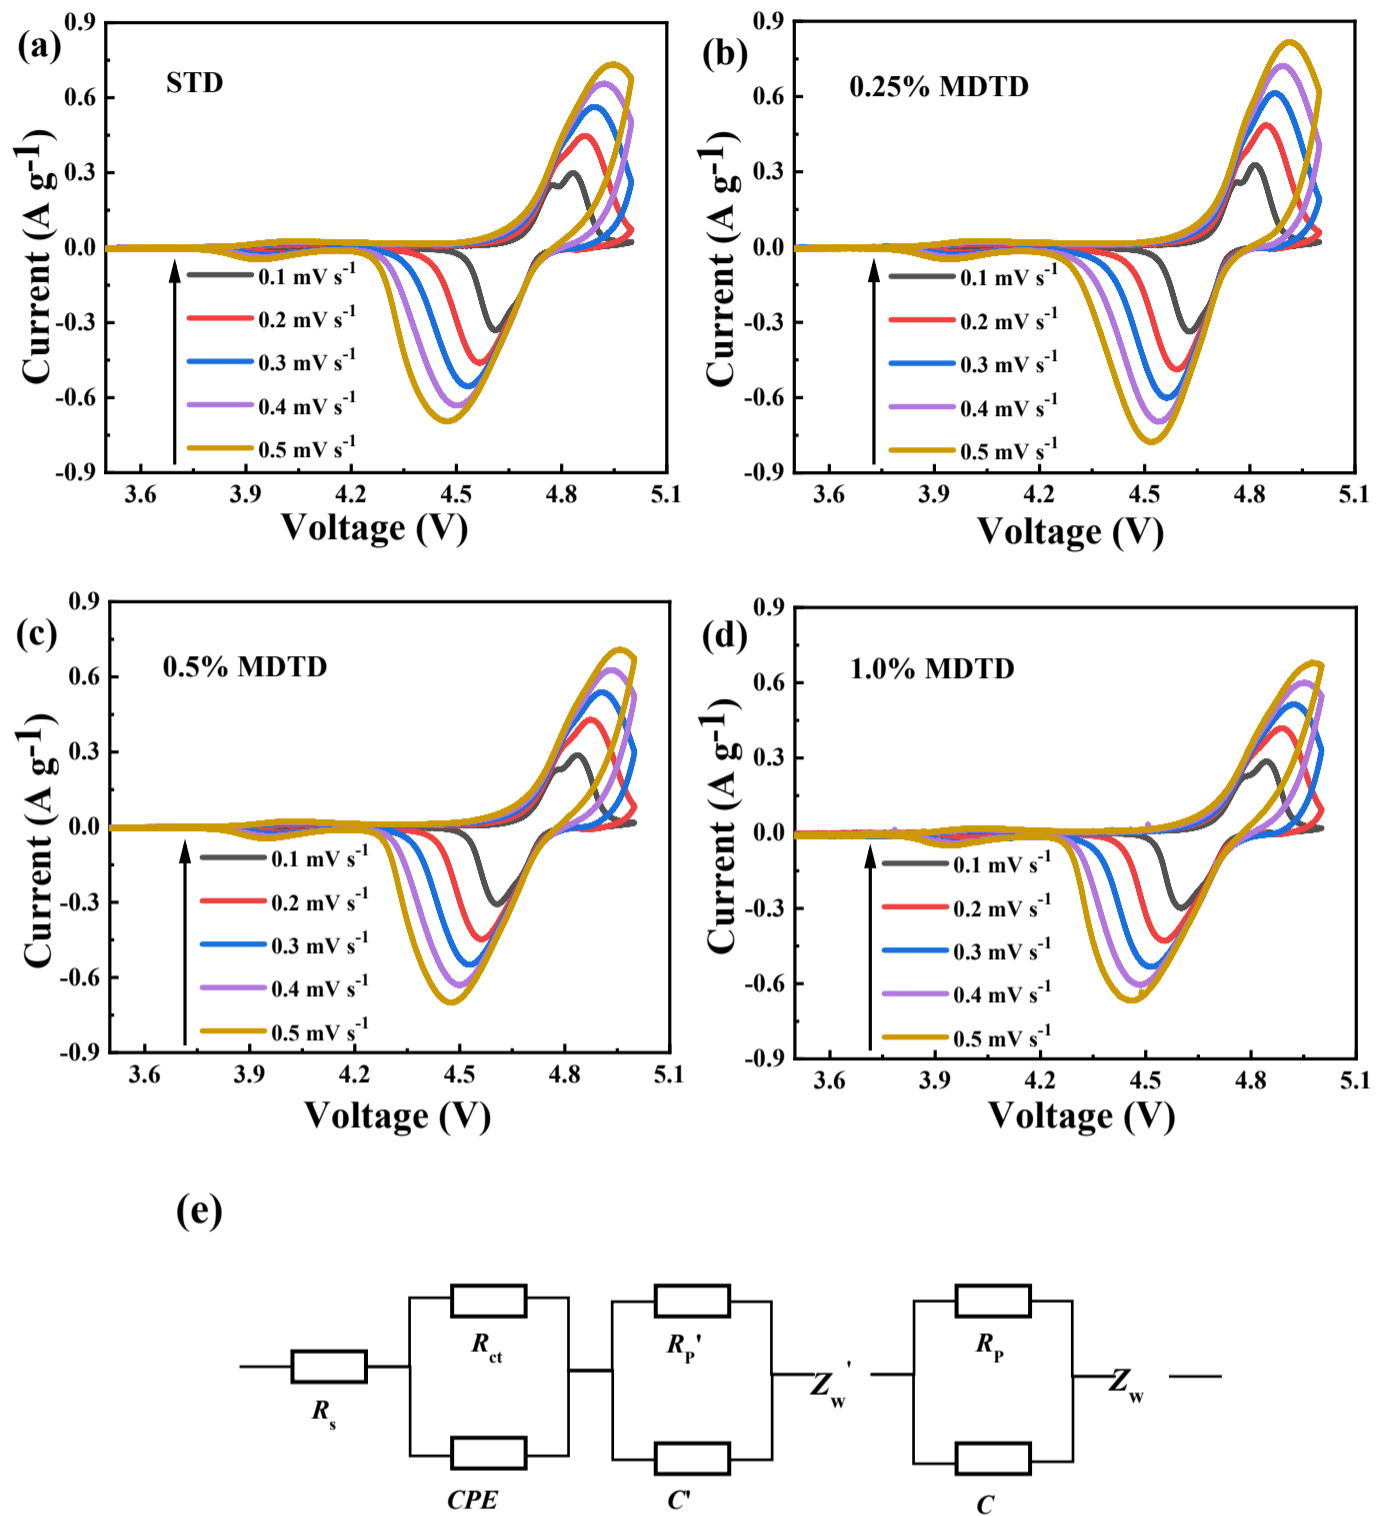

Figure S5. SEM and TEM images of (a, d) a fresh LNMO electrode, and LNMO electrodes disassembled from the LNMO/Li half-cells in the (b, e) STD, and (c, f) 0.5% MDTD electrolytes after 500 cycles at 5 C.

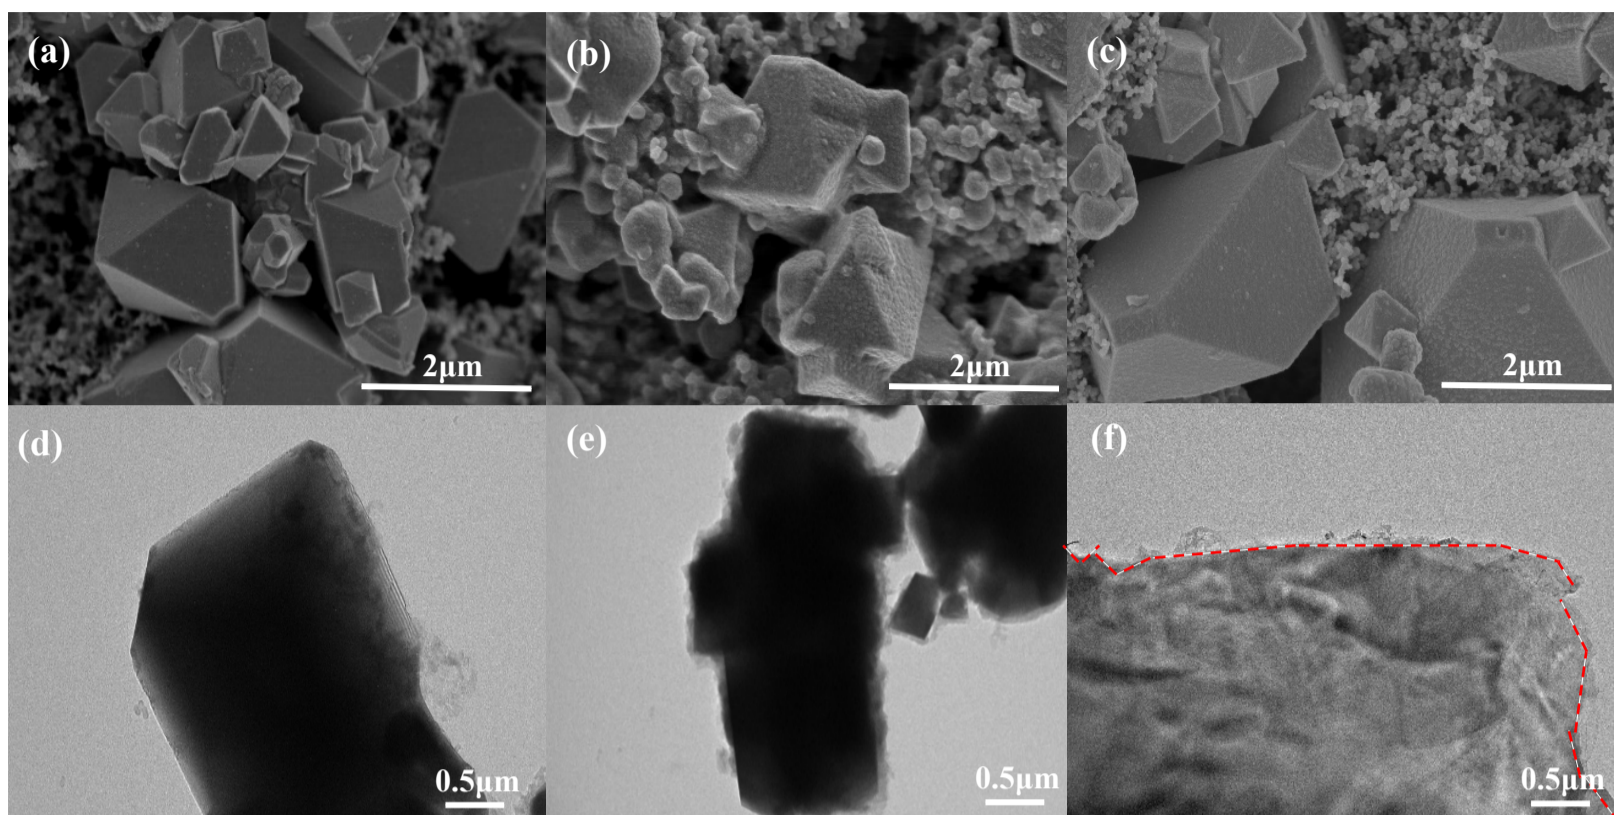

Figures S6. (a) Cycling performances and (b) galvanostatic charge–discharge curves of the graphite/Li half-cells in the STD and 0.5% MDTD electrolytes after 500 cycles at 1 C.

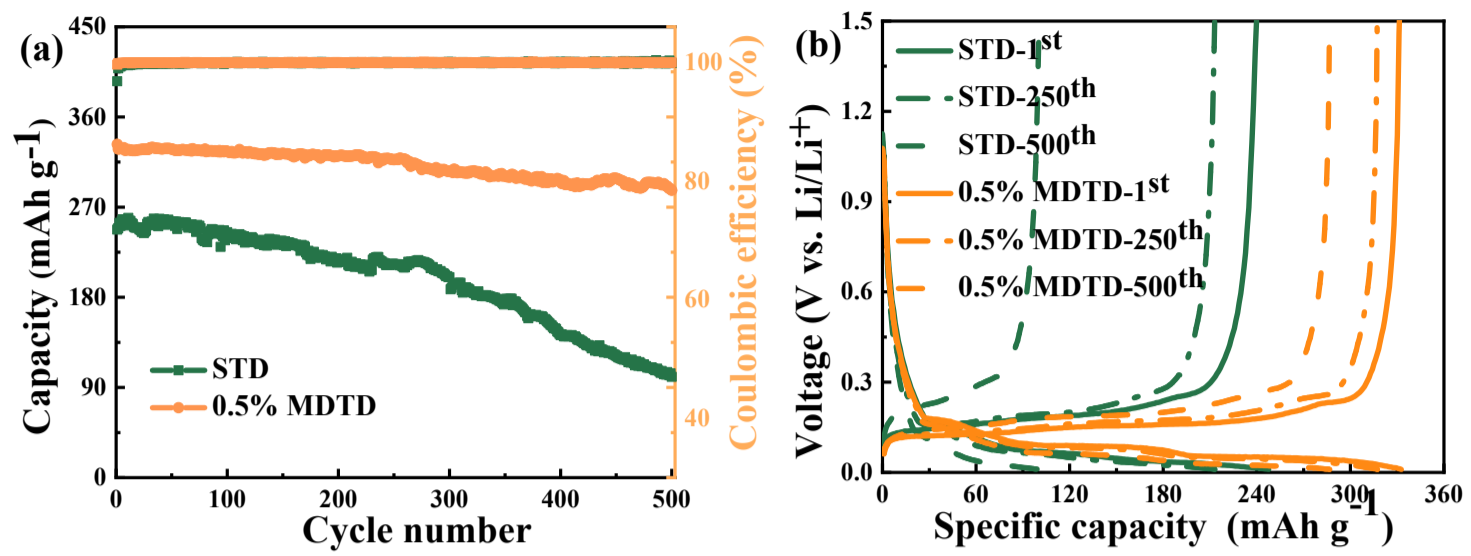

Figure S7. Cyclic voltammetry curves for the LNMO/LTO full-cells in the (a) STD and (b) 0.5% MDTD electrolytes before cycling at scan rates from 0.1 to 0.5  $\text{mV s}^{-1}$ .

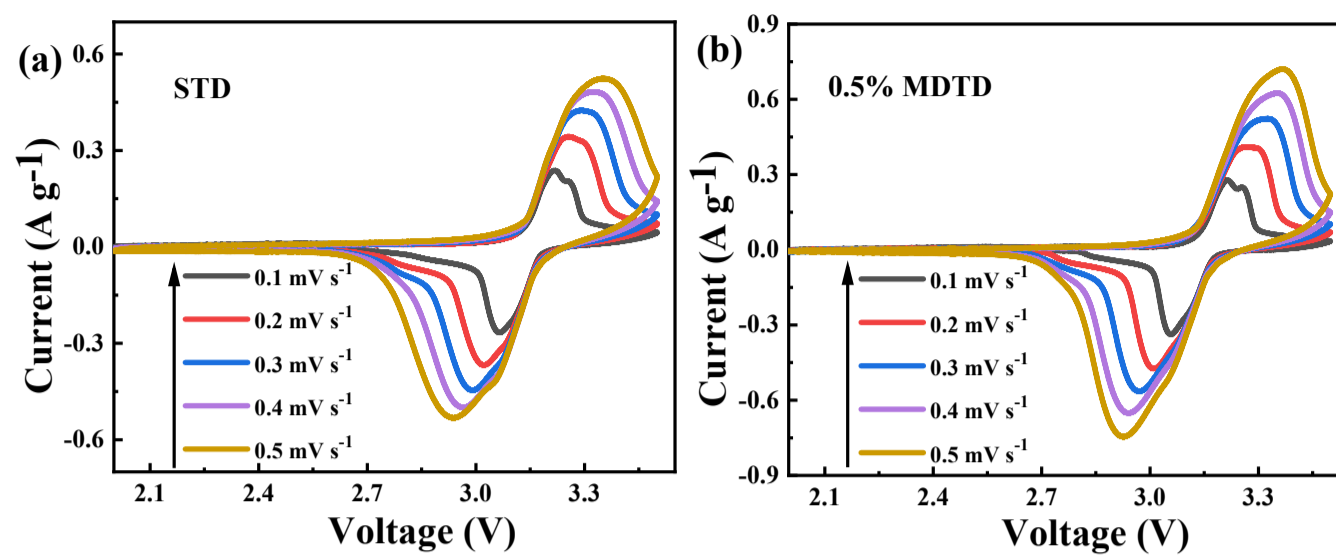

Table S1 The cycling performance of LNMO/LTO full-cells in representative reports

| Battery system<br>(Voltage range) | Key characteristics                                                     | Cyclability of the electrolyte with and without additive (Initial discharge capacity, retention, cycles, rate, temperature) | References |
|-----------------------------------|-------------------------------------------------------------------------|-----------------------------------------------------------------------------------------------------------------------------|------------|
| LNMO/LTO<br>(2.0–3.5 V)           | 2 mol L <sup>-1</sup> LiBF <sub>4</sub> -GBL/ADN<br>(1:1, vol%) +2% FEC | 96.9 vs. 82.5 mAh·g <sup>-1</sup> , 84.0% vs. 63.0% after 100 cycles, at 1 C rate,<br>at 25°C                               | 55         |
| LNMO/LTO<br>(1.4–3.4 V)           | LiTFSI/RTIL-based<br>electrolytes                                       | 90.0 vs. 81.0 mAh·g <sup>-1</sup> , 47.0% vs. 28.0% after 50 cycles, at 0.5 C rate,<br>at 40°C                              | 69         |
| LNMO/LTO<br>(1.5–3.5 V)           | GA as an electrolyte additive                                           | 130.0 vs. 133.0 mAh·g <sup>-1</sup> , 85.0% vs. 75.0% after 120 cycles, at 0.2 C<br>rate, at 20°C                           | 70         |
| LNMO/LTO<br>(2.0–3.5 V)           | 1.2 M LiPF <sub>6</sub> FEC/EMC/DEC<br>(3/3/4, wt%)                     | 93.5% after 500 cycles vs. 84.6% after 100 cycles, at 0.05 C rate, at<br>25°C                                               | 71         |
| LNMO/LTO<br>(2.0–3.5 V)           | Cross-linking PAMM-based<br>electrolyte                                 | 128.0 vs.127.8 mAh·g <sup>-1</sup> , 98.9% vs. 61.5% after 100 cycles, at 0.1 C<br>rate, at 25°C                            | 72         |
| LNMO/LTO<br>(2.0–3.5 V)           | LiDFOB as an electrolyte<br>additive                                    | 150.1 vs. 150.0 mAh·g <sup>-1</sup> , 85.6% vs. 13.3% after 2000 cycles, at 5 C<br>rate, at 25°C                            | 73         |
| LNMO/LTO<br>(2.0–3.5 V)           | MDTD as an electrolyte<br>additive                                      | 97.4 vs. 93.9 mAh·g <sup>-1</sup> , 81.8% vs. 37.2% after 200 cycles, at 5 C rate,<br>at 25°C                               | This work  |
